# Supplementary material for: Impact of Delayed Cord Clamping and Immediate Kangaroo Mother Care on Oxygen Saturation and Heart Rate in Moderate and Late Preterm Infants
Source: Research Square preprint supplement (doi:10.21203/rs.3.rs-7723558/v1), 2025-10-15
Supplement: Supplementary file 1 [file 8fbfcac035e17dcffb3ba8e7.pdf]

**Table 1. Characteristics of the mother, newborn, delivery, and clinical parameters.**

| <b>Clinical Characteristics</b>                         | <b>Population (N=96)</b> |
|---------------------------------------------------------|--------------------------|
| Mothers' age, years, mean (SD)                          | 32.3 (6.2)               |
| Vaginal birth n, (%)                                    | 52 (54.1)                |
| Spontaneous onset of labor, (%)                         | 38 (39.5)                |
| Epidural analgesia, n, (%)                              | 64 (66.6)                |
| Instrumental delivery, n, (%)                           | 14 (14.5)                |
| Antenatal steroids newborn $\leq 33^{+6}$ weeks, n, (%) | 11 (73.3)                |
| Gestational age, weeks, median (Q1, Q3)                 | 35 (34,36)               |
| Gestational age, weeks, % of total                      |                          |
| 32                                                      | 5 (5.2)                  |
| 33                                                      | 10 (10.4)                |
| 34                                                      | 24 (25.0)                |
| 35                                                      | 27 (28,1)                |
| 36                                                      | 30 (31.2)                |
| Delayed cord clamping, seconds, mean (SD)               | 70 (27.1)                |
| Birthweight, g, mean (SD)                               | 2294.8 (397.2)           |
| Sex male, n, %                                          | 51 (53.1)                |
| Apgar score 1 min, mean (Q1, Q3)                        | 9 (9 ,10)                |
| Apgar score 5 min, mean (Q1, Q3)                        | 10 (10, 10)              |

**Table 2.** Median peripheral oxygen saturation (SpO<sub>2</sub>) in moderate and late preterm (MLPT) neonates with and without immediate Kangaroo Mother Care (iKMC) during the first 10 minutes of life.

| Median peripheral oxygen saturation (SpO <sub>2</sub> ) |                                   |                 |                                    |                 |
|---------------------------------------------------------|-----------------------------------|-----------------|------------------------------------|-----------------|
| Time (s)                                                | NO Immediate Kangaroo Mother Care |                 | YES Immediate Kangaroo Mother Care |                 |
|                                                         | Median SpO <sub>2</sub> (%)       | IQR 95% CI      | Median SpO <sub>2</sub> (%)        | IQR 95% CI      |
| 120                                                     | 70.98                             | (63.23 – 77.67) | 76.25                              | (66.18 – 84.05) |
| 180                                                     | 77.54                             | (71.11 – 82.89) | 83.20                              | (75.18 – 89.01) |
| 240                                                     | 84.11                             | (79.05 – 88.13) | 88.36                              | (82.26 – 92.55) |
| 300                                                     | 88.91                             | (87.05 – 91.85) | 92.00                              | (87.50 – 94.97) |
| 360                                                     | 91.93                             | (88.95 – 94.16) | 94.23                              | (90.82 – 96.43) |
| 420                                                     | 93.77                             | (91.28–95.58)   | 95.13                              | (92.00 – 97.08) |
| 480                                                     | 94.44                             | (92.17 – 96.07) | 96.05                              | (93.56 – 97.61) |
| 540                                                     | 95.51                             | (93.58 – 96.88) | 96.83                              | (94.75 – 98.10) |
| 600                                                     | 95.66                             | (93.70 – 97.03) | 96.93                              | (94.86 – 98.19) |

SpO<sub>2</sub> values are presented as percentages (%), along with their respective interquartile ranges (IQR) and 95% confidence intervals (95% CI).

**Table 3.** Median heart rate (HR) in moderate and late preterm (MLPT) neonates with and without immediate Kangaroo Mother Care (iKMC) during the first 10 minutes of life.

| Median heart rate (HR)                         |              |                   |                                              |                   |
|------------------------------------------------|--------------|-------------------|----------------------------------------------|-------------------|
| NO Immediate Kangaroo Mother Care<br>(NO iKMC) |              |                   | Immediate Kangaroo Mother Care<br>(YES iKMC) |                   |
| Time (s)                                       | Median<br>HR | IQR<br>95% CI     | Median<br>HR                                 | IQR<br>95% CI     |
| 120                                            | 90.10        | (87.74 – 98.46)   | 102.19                                       | (89.91 – 117.46)  |
| 180                                            | 98.26        | (87.42 – 109.11)  | 113.35                                       | (98.43 – 128.27)  |
| 240                                            | 109.43       | (98.97 – 119.88)  | 124.51                                       | (109.84 – 139.18) |
| 300                                            | 120.08       | (109.88 – 130.28) | 135.17                                       | (120.65 – 149.68) |
| 360                                            | 127.66       | (117.58– 137.74)  | 142.75                                       | (128.28 – 157.21) |
| 420                                            | 130.13       | (120.03 – 140.23) | 145.21                                       | (130.71 – 159.71) |
| 480                                            | 129.52       | (119.28 – 139.77) | 144.61                                       | (129.98 – 159.24) |
| 540                                            | 128.40       | (117.88 – 138.94) | 143.49                                       | (128.64 – 158.35) |
| 600                                            | 127.29       | (116.35 – 138.24) | 142.38                                       | (127.21 – 157.55) |

HR values are presented in beats per minute (bpm), along with their respective interquartile ranges (IQR) and 95% confidence intervals (95% CI).

**Table 4.** Neonatal body temperatures in moderate and late preterm (MLPT) neonates with and without immediate Kangaroo Mother Care (iKMC) at different time points after birth.

| Variable                       | iKMC Yes<br>(n=45) | Non. iKMC<br>(n=51) | p-<br>valor  | Diferencia (IC 95%)  |
|--------------------------------|--------------------|---------------------|--------------|----------------------|
| Temp at 2-3 min<br>after birth | 36.05 ± 0.96       | 35.83 ± 0.96        | <b>0.041</b> | +0.22°C [0.01, 0.43] |
| Temp at 5 min of life          | 36.38 ± 0.60       | 36.11 ± 0.68        | <b>0.018</b> | +0.27°C [0.05, 0.49] |
| Temp at 10 min of life         | 36.62 ± 0.52       | 36.30 ± 0.66        | <b>0.003</b> | +0.32°C [0.12, 0.52] |
| Temp at admission/end          | 36.55 ± 0.47       | 36.28 ± 0.52        | <b>0.009</b> | +0.27°C [0.07, 0.47] |

Temperature values are presented as means ± standard deviations (SD), along with *p*-values and 95% confidence intervals (95% CI) for the mean differences between groups.

**Supplemental Table 1:** Perinatal and clinical characteristics of moderate and late preterm (MLPT) neonates who were (Yes iKMC, n=45) or not (No iKMC, n=51) subjected to immediate Kangaroo Care in the delivery room.

|                                   | <b>"Yes iKMC"<br/>Group (n=45)</b> | <b>"No iKMC"<br/>Group (n=51)</b> | <b>P- value</b> |
|-----------------------------------|------------------------------------|-----------------------------------|-----------------|
| Gestational age (weeks), (Q1 -Q3) | 35.1 (34.7 -35.5)                  | 34.9 (34.4 – 35.4)                | 0.416           |
| Birth weight (g), mean $\pm$ SD   | 2345.6 $\pm$ 352.8                 | 2250.4 $\pm$ 492.3                | 0.2751          |
| Apgar 5', median (Q1,Q3)          | 9 (9,10)                           | 10 (9,10)                         | 0.4172          |
| Apgar 10', median (Q1,Q3)         | 10 (10 -10)                        | 10 (10 -10)                       | 0.0551          |
| Arterial pH, mean $\pm$ SD        | 7.24 $\pm$ 0.08                    | 7.27 $\pm$ 0.07                   | 0.0552          |
| Venous pH, mean $\pm$ SD          | 7.30 $\pm$ 0.06                    | 7.33 $\pm$ 0.07                   | 0.0582          |
| Sex, female, n(%)                 | 19 (42.2)                          | 23 (45.1%)                        | 0.8971          |
